# Supplementary material for: DNA methylation mediates the effect of cocaine use on HIV severity
Source: PubMed Central journal article supplement (PMC7491141; doi:10.1186/s13148-020-00934-1), 2020-09-14

## Persistent cocaine use EWA

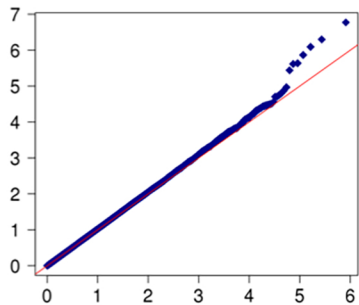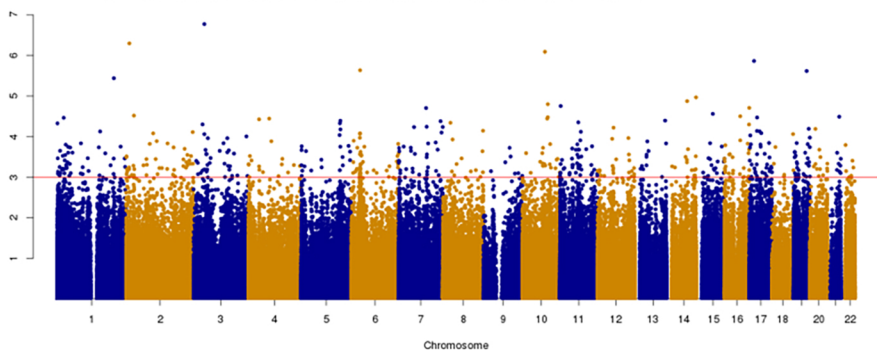

## HIV severity EWA

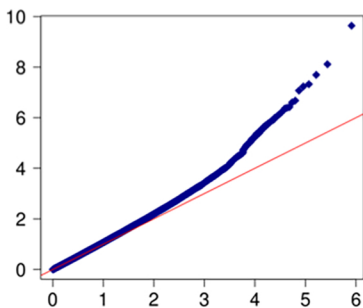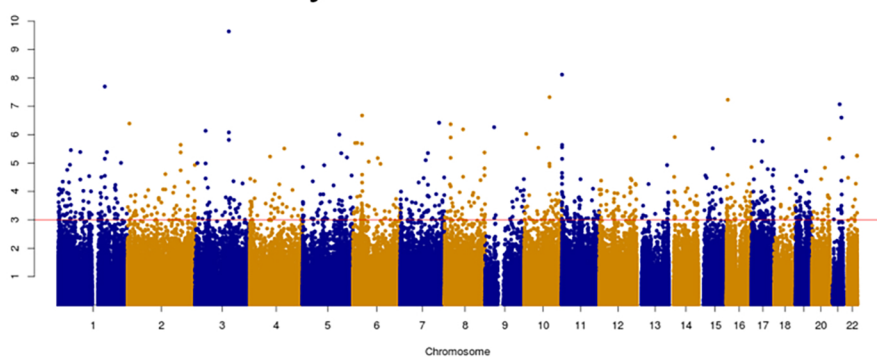

Supplement: 13148_2020_934_MOESM1_ESM.pdf [file 13148_2020_934_MOESM1_ESM.pdf]
